# Supplementary material
Source: Royal Society of Chemistry journal article supplement (doi:10.1039/d6qm00207b)
Supplement: d6qm00207b1.pdf [file d6qm00207b1.pdf]

## ***Citric Acid Enable Morphological Optimization of Ni<sub>3</sub>(PO<sub>4</sub>)<sub>2</sub> Next Generation High Performance Hybrid Supercapacitors***

*Mohsenah H. J. Mashniwi<sup>1</sup>, Muhammad Saqib<sup>2</sup>, Ali Asghar\*<sup>2</sup>, Majed Y A Almashnowi<sup>3</sup>, Faris Alfifi<sup>3</sup>, Shahir Hussain<sup>4</sup>, Muneerah Alomar<sup>5</sup>, Noorjahan Abdul Azees<sup>6</sup>, Muhammad Shahid Rashid\*<sup>7</sup>*

*<sup>1</sup>Department of Physics, Faculty of Sciences, King Khalid University, P. O. Box 9004, 61421, Abha, Kingdom of Saudi Arabia*

*<sup>2</sup>Additive Manufacturing Institute, Shenzhen University, Shenzhen, China*

*<sup>3</sup>Department of Physical Sciences, Chemistry Division, College of Science, Jazan University, P.O.Box. 114, Jazan 45142, Kingdom of Saudi Arabia*

*<sup>4</sup>Department of electrical and electronics engineering, college of engineering and computer science, Jazan University, P.O.Box. 114, Jazan 45142, Kingdom of Saudi Arabia*

*<sup>5</sup>Department of Physics, College of Science, Princess Nourah bint Abdulrahman University, P. O. Box 84428, Riyadh 11671, Saudi Arabia.*

*<sup>6</sup>Department of Mathematics, College of Science, Jazan University, P.O. Box 277, Jazan 45142, Saudi Arabia*

*<sup>7</sup>Department of Physical Sciences, Physics Division, College of Science, Jazan University, P.O.Box. 114, Jazan 45142, Kingdom of Saudi Arabia*

*Corresponding author Email: [mrashid@jazanu.edu.sa](mailto:mrashid@jazanu.edu.sa) (MS Rashid), [aliasghar504786@gmail.com](mailto:aliasghar504786@gmail.com) (A Asghar)*

### **1. Structure Characterization**

The samples crystal phase examination was observed by X-ray diffraction (XRD, TTR-III, Rigaku, Japan). Surface morphology and elemental mapping were studied using field-emission scanning electron microscopy (FE-SEM) and energy-dispersive X-ray spectroscopy (EDS). X-ray photoelectron spectroscopy (XPS; K-Alpha, Thermo Scientific, UK) measures the oxidation and elemental composition. Barrett-Joyner-Halenda (BJH) analysis and Brunauer-Emmett-Teller (BET) theory, that included N<sub>2</sub> desorption-adsorption data, were used to calculate the specific area of surface and pore dimension distributions.

### **2. Electrochemical Measurements**

The electrochemical measurements, consisting of cyclic voltammetry (CV) (scan rate (SR) of 3 to 80 mV s<sup>-1</sup>), Galvanostatic Charging/Discharging (GCD) (current density (CD) of 1 to 15 A/g), and electrochemical impedance spectroscopy (EIS) (frequency was 10 to 102

kHz), of a single bulk electrode, were studied utilizing a 3-electrode system in a 2 M KOH electrolytic solution through (CHI660E, China). The working electrodes were deposited on NF, while the counter and reference electrodes were a Pt plate and Hg/HgO. The capacitance values, such as gravimetric capacitance and Capacity through CV and GCD of the electrodes, were calculated utilizing the following Eq. (S1-S4)[1]:

$$C_{sc} (F/g) = \frac{\int_{v_i}^{v_f} I \times V dV}{m * s * \Delta V} \quad (S1)$$

$$C_{sq} (C/g) = \frac{\int_{v_i}^{v_f} I \times V dV}{m * s} \quad (S2)$$

$$S_{sc} = \frac{I \times \Delta t}{A * \Delta V} \quad (S3)$$

$$S_{sq} = \frac{I \times \Delta t}{m} \quad (S4)$$

Here, specific capacitance (Csc) and capacity (Csq) are calculated by CV. The integral part represents the area of a polygon, m is the deposit mass, s is the SR, and  $\Delta V$  exhibits the potential window. The GCD profile measures the specific capacitance (Ssc) and capacity (Ssq). I, delta t, and m represent the CD, discharging time, and active mass loading on the electrode, respectively.

The NPCA0.5 was assembled into an asymmetric supercapacitor (ASC) device with NF as a current collector and filter paper as the separator. The electrochemical activity assembled ASC was also evaluated in the same workstation with a 2-electrode setup. The following Eqs. (S5 and S6) are utilized to measure the specific energy (SE), and specific power (SP), accordingly [2]:

$$SE = \frac{1}{2 * 3.6} S_{sc}(\Delta V)^2 \quad (S5)$$

$$SP = \frac{3600 * SE}{t} \quad (S6)$$

Here,  $\Delta V$  and  $t$  represented the potential window, and time of discharging, accordingly.

### 3. Fabrication of Asymmetric Supercapacitor

An asymmetric SC device was constructed utilizing electrodes made of NPCA0.5 for the cathode and activated carbon for the anode. Whatman 1 filter paper was employed as a separator among the electrodes. The assembly was subsequently encased in paraffin film to achieve a functional gadget. The electrochemical examination of the constructed gadget was performed in a 2 M KOH aqueous solution. The amount of weight on each electrode in the device is balanced using the [Es. S7](#).

$$m^+C^+V^+ = m^-C^-V^- \quad (S7)$$

$C^+$  and  $C^-$  (F/g) define the  $C_{sc}$   $m^+$  and  $m^-$ , while (g) signifies the active mass of the cathode and anode materials, accordingly. The mass of AC in the anode is 2 mg.

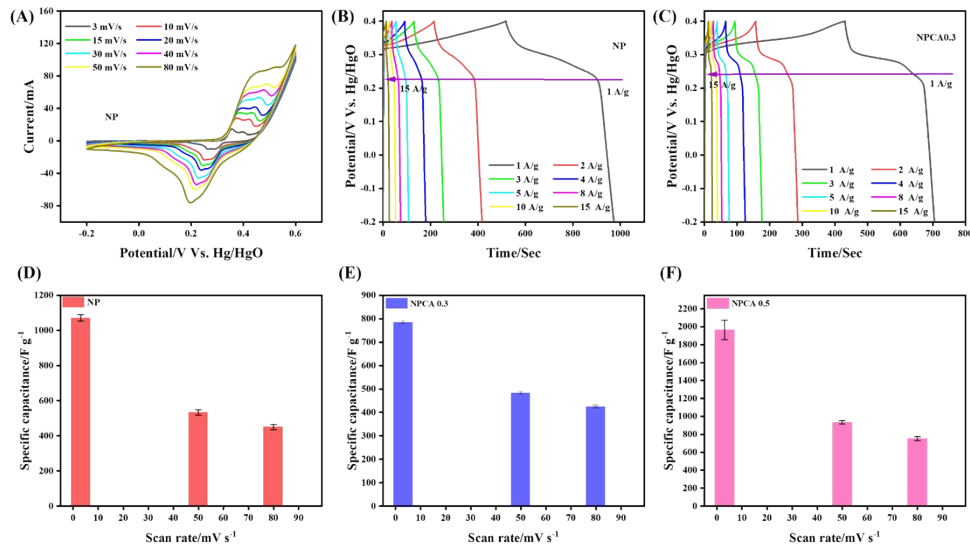

**Fig. S1:** (A) CV analysis of NPCA and GCD analysis of (B) NPCA and (C) NPCA0.3 and (D-E) Specific capacitance with standard deviation bar chart of prepared electrodes at 3, 50, 80 mV/s scan rates.

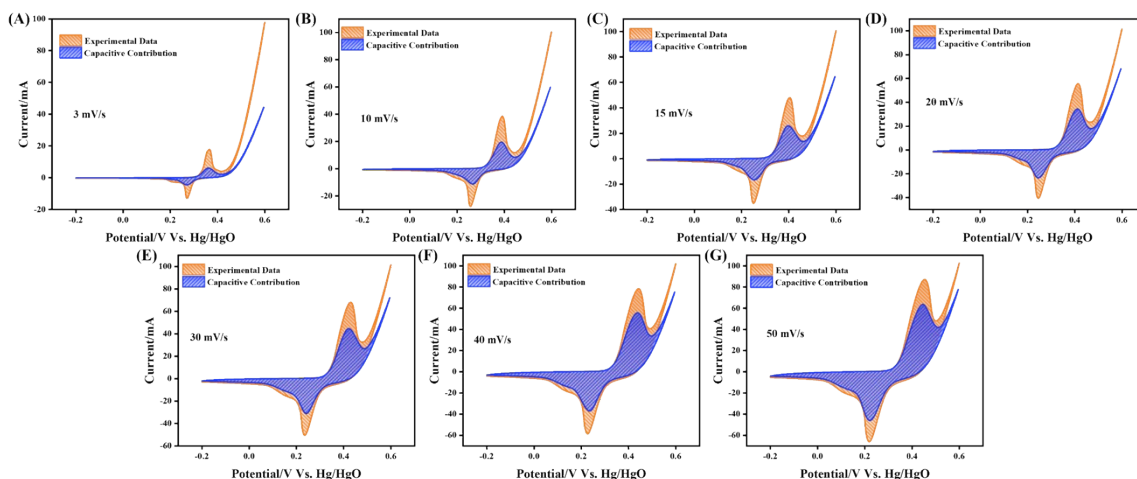

**Fig. S2:** (A-G) Capacitive and diffusive CV of NPCA0.3 electrodes at different scan rates of 3 to 50 mV/s.

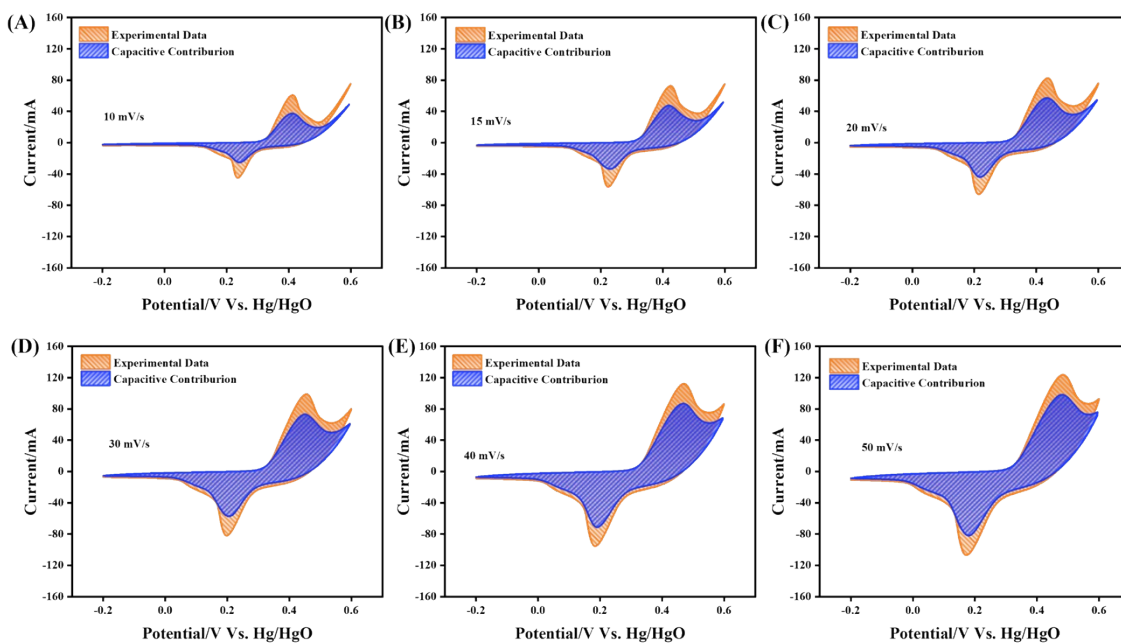

**Fig. S3:** (A-F) Capacitive and diffusive CV of NPCA0.5 electrode at different scan rates of 10 to 50 mV/s.

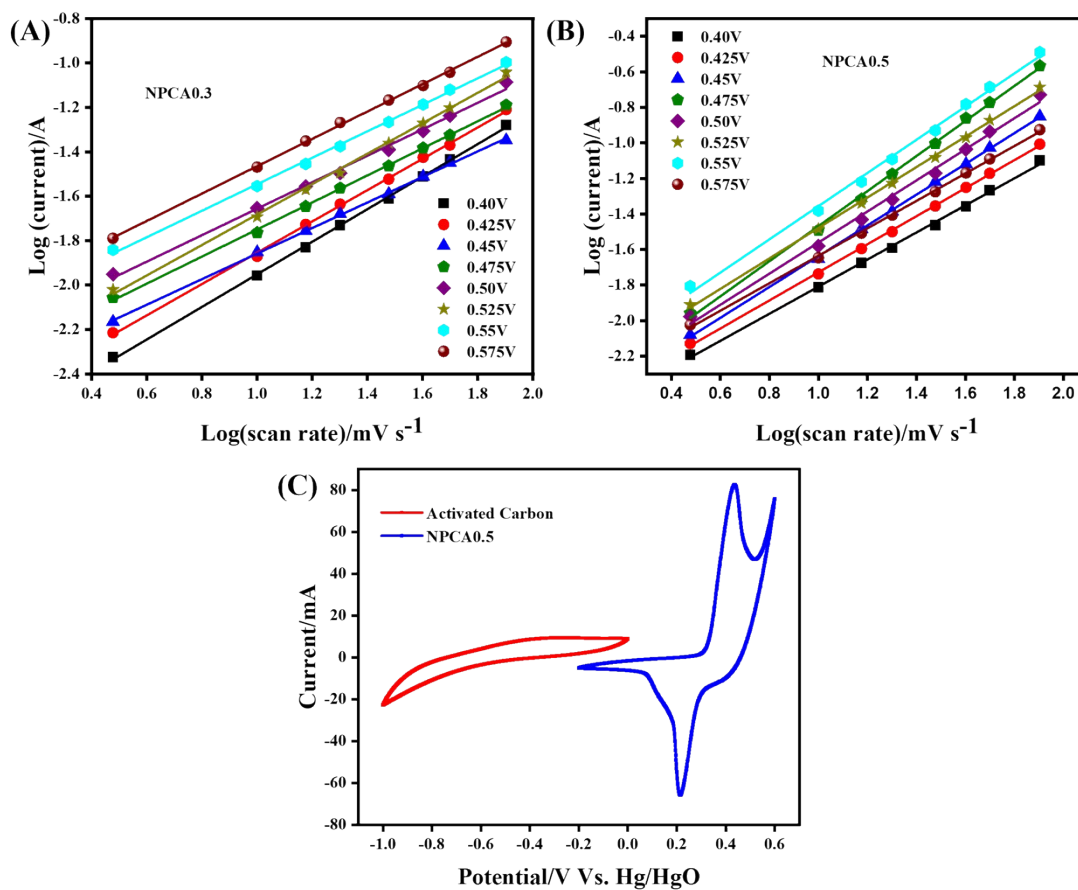

**Fig. S4:** Calculated b values at different potentials of (A) NPCA0.3, (B) NPCA0.5 and (C) CV analysis of NPCA0.5 and AC at scan rate of 20 mV/s.

**Table S1:** Specific capacitance and capacity of NP. NPA0.3, and NPA0.5 at different scan rates of 3 to 80 mV/s.

| Scan Rate (mV/s) | Specific Capacitance (F/g) |       |        | Specific Capacity (C/g) |       |        |
|------------------|----------------------------|-------|--------|-------------------------|-------|--------|
|                  |                            |       |        |                         |       |        |
| 3                | 1090.1                     | 791.4 | 2034.8 | 872.1                   | 633.1 | 1627.8 |
| 10               | 856.9                      | 646.9 | 1486.0 | 685.5                   | 517.6 | 1188.8 |
| 15               | 779.5                      | 616.4 | 1348.6 | 623.6                   | 493.1 | 1078.9 |
| 20               | 721.1                      | 585.3 | 1256.6 | 576.9                   | 468.3 | 1005.2 |
| 30               | 642.5                      | 542.1 | 1126.7 | 514.0                   | 433.7 | 901.4  |
| 40               | 582.8                      | 509.5 | 1025.3 | 466.3                   | 407.6 | 820.2  |

|           |       |       |       |       |       |       |
|-----------|-------|-------|-------|-------|-------|-------|
| <b>50</b> | 534.9 | 482.7 | 939.9 | 427.9 | 386.2 | 751.9 |
| <b>80</b> | 452.5 | 424.1 | 755.4 | 362.0 | 339.3 | 604.2 |

**Table S2:** Specific capacitance value with previous reported works.

| <b>No.</b> | <b>Electrode Name</b>                                   | <b>Specific Capacitance</b> | <b>Scan Rate/Current Density</b> | <b>Ref.</b> |
|------------|---------------------------------------------------------|-----------------------------|----------------------------------|-------------|
| 1          | FeNiC/rGO                                               | 1510.5 F/g                  | --/2 A/g                         | [3]         |
| 2          | P-CuCo <sub>2</sub> O <sub>4</sub>                      | 1260.0 F/g                  | --/1 A/g                         | [4]         |
| 3          | SWCNTs/C1Z1S                                            | 1750 F/g                    | 10 mV s <sup>-1</sup> /--        | [5]         |
| 4          | FCP3                                                    | 1950 F/g                    | 10 mV s <sup>-1</sup> /--        | [6]         |
| 5          | NP450-100 AC                                            | 2009.8                      | --/1 A/g                         | [7]         |
| 6          | NiP-6                                                   | 1192 F/g                    | 10 mV s <sup>-1</sup> /--        | [8]         |
| 7          | CMVC-4                                                  | 1848.6 F/g                  | --/2 A/g                         | [9]         |
| 8          | Mn <sub>0.5</sub> Co <sub>0.5</sub> (HPO <sub>4</sub> ) | 1727 F/g                    | --/1 A/g                         | [10]        |
| 9          | NPO-30                                                  | 1535 C/g                    | 5 mV s <sup>-1</sup> /--         | [11]        |
| 10         | Ni-Co-P80                                               | 1916.9 F/g                  | 5 mV s <sup>-1</sup> /--         | [12]        |
| 11         | NiCoNPO                                                 | 1835 F/g                    | 5 mV s <sup>-1</sup> /--         | [13]        |
| 12         | NPCA0.5                                                 | 2034 F/g                    | 3 mV s <sup>-1</sup> /--         | This Work   |

**Table S3:** Specific capacitance and capacity of NP, NPA0.3, and NPA0.5 at different current densities of 1 to 15 A/g.

| <b>Current Density (A/g)</b> | <b>Specific Capacitance (F/g)</b> |       |        | <b>Specific Capacity (C/g)</b> |       |       |
|------------------------------|-----------------------------------|-------|--------|--------------------------------|-------|-------|
| <b>1</b>                     | 758.8                             | 455.5 | 1067.6 | 455.3                          | 273.3 | 640.5 |
| <b>2</b>                     | 670.3                             | 431.3 | 1013.0 | 402.2                          | 258.8 | 607.8 |

|           |       |       |       |       |       |       |
|-----------|-------|-------|-------|-------|-------|-------|
| <b>3</b>  | 620.0 | 418.5 | 899.5 | 372.0 | 251.1 | 539.7 |
| <b>4</b>  | 590.7 | 408.0 | 858.0 | 354.4 | 244.8 | 514.8 |
| <b>5</b>  | 544.0 | 376.0 | 795.0 | 326.4 | 225.6 | 477.0 |
| <b>8</b>  | 485.3 | 364.0 | 776.0 | 291.2 | 218.4 | 465.6 |
| <b>10</b> | 421.7 | 366.7 | 718.3 | 253.0 | 220.0 | 431.0 |
| <b>15</b> | 342.5 | 250.0 | 637.5 | 205.5 | 150.0 | 382.5 |

**Table S4:** Discharging time of NP, NPA0.3, and NPA0.5 at different current densities.

| <b>Current Density (mV/s)</b> | <b>Discharging Time (Sec)</b> |       |       |
|-------------------------------|-------------------------------|-------|-------|
| <b>1</b>                      | 455.3                         | 273.3 | 640.5 |
| <b>2</b>                      | 201.1                         | 129.4 | 303.9 |
| <b>3</b>                      | 124                           | 83.7  | 179.9 |
| <b>4</b>                      | 88.6                          | 61.2  | 128.7 |
| <b>5</b>                      | 54.4                          | 37.6  | 79.5  |
| <b>8</b>                      | 36.4                          | 27.3  | 58.2  |
| <b>10</b>                     | 25.3                          | 22    | 43.1  |
| <b>15</b>                     | 13.7                          | 10    | 25.5  |

**Table S5:** Ragone plot comparative study of current work and previous reported work.

| <b>Electrode Type</b>                                                | <b>Specific Capacitance (F/g)</b> | <b>Energy Density (Wh/kg)</b> | <b>Power Density (W/kg)</b> | <b>Stability/ Cycles</b> | <b>Ref.</b> |
|----------------------------------------------------------------------|-----------------------------------|-------------------------------|-----------------------------|--------------------------|-------------|
| Ni <sub>2</sub> Mn(PO <sub>4</sub> ) <sub>2</sub> .8H <sub>2</sub> O | 163.1                             | 66.22                         | 400                         | 81%/15k                  | [14]        |
| NCP//AC                                                              | 144.7                             | 45.2                          | 749.9                       | 70%/10k                  | [15]        |
| NCPCA//AC                                                            | 163                               | 10.8                          | 749                         | 88%/5k                   | [16]        |

|                                                                                         |              |             |               |                 |                |
|-----------------------------------------------------------------------------------------|--------------|-------------|---------------|-----------------|----------------|
| NiCo-P/Ni <sub>3</sub> V <sub>2</sub> O <sub>8</sub> //AC                               | 208          | 65          | 750           | 84.2%/10k       | [17]           |
| AC//YS-CNHP                                                                             | 143.1        | 50.9        | 800           | 69.5%/10k       | [18]           |
| NV <sub>2</sub> O <sub>5</sub> @CoS//AC                                                 | 178.4        | 71.6        | 849.8         | 90.6%/10k       | [19]           |
| MnCo <sub>2</sub> O <sub>4</sub> @NiMo-LDH                                              | 116.1        | 43.2        | 815.8         | 71%/5k          | [20]           |
| S-CNP5//PVA-KOH//rGO                                                                    | 120          | 42.59       | 1600          | 90%/5k          | [21]           |
| Cu <sub>2</sub> P <sub>2</sub> O <sub>7</sub> //AC                                      | 167.6        | 39.5        | 1086          | -               | [22]           |
| P-CoNi <sub>2</sub> Se <sub>4</sub> /Ti <sub>3</sub> C <sub>2</sub> T <sub>x</sub> //AC | 105.1        | 37.4        | 800           | 80%/5k          | [23]           |
| FeP@CNTF//Ni <sub>2</sub> P@CNTF                                                        | 191.1        | 67.9        | 800           | 69.4%/10k       | [24]           |
| MnP <sub>6</sub> Mo <sub>18</sub> @PCNFs//AC                                            | 188.2        | 71.2        | 830.1         | 93%/10k         | [25]           |
| <b>NPCA0.5//KOH//AC</b>                                                                 | <b>228.1</b> | <b>81.1</b> | <b>1146.1</b> | <b>92.3%/6k</b> | <b>Current</b> |

- Iqbal, M.Z., U. Abbasi, and M. Alzaid, *Cobalt manganese phosphate and sulfide electrode materials for potential applications of battery-supercapacitor hybrid devices*. Journal of Energy Storage, 2022. **50**: p. 104632.
- Ye, H., et al., *Advanced MXene/graphene oxide/lignosulfonate inks for 3D printing thick electrodes with vertically aligned pores to dually boost mass loading and areal capacitance*. Advanced Functional Materials, 2025. **35**(3): p. 2413343.
- Pan, H., et al., *Metal organic framework derivatives as matched positive and negative electrodes for high energy and power density asymmetric supercapacitors*. Journal of Energy Storage, 2026. **149**: p. 120427.
- Fan, L., et al., *Study of phosphorization effect on urchin-like CuCo<sub>2</sub>O<sub>4</sub> cathodes for high-performance supercapacitors*. Journal of Alloys and Compounds, 2025. **1010**: p. 177362.
- Hamayun, U., et al., *Optimization of the redox-active copper zinc sulfides with the integration of SWCNTs nanocomposites for the asymmetric supercapacitor*. Journal of Power Sources, 2026. **672**: p. 239572.
- Sutar, P., P. Deshmukh, and A. Kadam, *Enhanced electrochemical performance of Fe doped CoCuP electrodes: Derived 3D nanopetals for supercapacitor application*. Journal of Energy Storage, 2026. **146**: p. 120150.
- Fan, L., et al., *Efficient synthesis of high-performance nickel phosphide cathodes for supercapacitors and insights into charge storage dynamics*. Journal of Energy Storage, 2026. **145**: p. 119802.
- Yadav, A.A., et al., *Enhanced asymmetric supercapacitor performance using 2D Ni<sub>2</sub>P<sub>2</sub>O<sub>7</sub> nanoplates with high specific capacitance*. Journal of Energy Storage, 2026. **161**: p. 121717.
- Katkar, P.K., S.-H. Chun, and S.-W. Lee, *Rational design and electrochemical characterization of a 3D cobalt phosphate/MXene/vertical graphene nanohills (VGNHs) heterostructure for supercapacitor applications*. Journal of Alloys and Compounds, 2026. **1050**: p. 185907.
- Ahn, K.-S., et al., *A high-performance asymmetric supercapacitor consists of binder free electrode materials of bimetallic hydrogen phosphate (MnCo(HPO<sub>4</sub>)) hexagonal tubes and graphene ink*. Electrochimica Acta, 2022. **426**: p. 140763.

11. Aldayyat, A., F.K. Yam, and M.D.J. Ooi, *Nickel phosphate/graphene oxide with excellent performance for asymmetric supercapacitor*. *Diamond and Related Materials*, 2026. **161**: p. 113165.
12. Li, H., et al., *Phosphate ion-functionalized nickel-cobalt layered double hydroxide nanosheets derived from metal-organic framework compounds for high-performance asymmetric supercapacitors*. *Journal of Alloys and Compounds*, 2023. **935**: p. 167876.
13. Mohanty, R.I., et al., *Hybrid bimetallic phosphonates as cathode materials for miniaturized in-plane asymmetric supercapacitor device*. *Journal of Energy Storage*, 2024. **80**: p. 110313.
14. Li, M., et al., *Rational design of crystalline/amorphous nickel manganese phosphate octahydrate heterostructure for high-performance aqueous and all-solid-state asymmetric supercapacitors*. *Chemical Engineering Journal*, 2024. **482**: p. 148895.
15. Thilagasubbulakshmi, A. and P. Sivakumar, *Facile synthesis of nickel-cobalt phosphate binary nanocomposite with an enriched electrochemical performance for asymmetric supercapacitor applications*. *Journal of Materials Science: Materials in Electronics*, 2024. **35**(22): p. 1551.
16. Mustafa, M.N., et al., *Chronoamperometric optimisation of bimetallic nickel-cobalt phosphate electrodes for dual-function electrochromic supercapacitors*. *Journal of Power Sources*, 2025. **658**: p. 238327.
17. Hao, Y., et al., *Highly dispersive nickel vanadium oxide nanoparticles anchored on nickel cobalt phosphate micron-sheets as cathodes for high-energy hybrid supercapacitor devices*. *Journal of Alloys and Compounds*, 2025. **1010**: p. 177893.
18. Jia, X., et al., *Controllable construction of porous yolk shell phosphate-functionalized Co/Ni-layered double hydroxides for high-performance supercapacitor*. *Electrochimica Acta*, 2025. **537**: p. 146853.
19. Zhou, W., et al., *Guiding nitrogen doped vanadium pentoxide nanoclusters on cobalt sulfide nano-flakiness as stable seamless interface anode toward highly energy density and durable asymmetric supercapacitors*. *Journal of Colloid and Interface Science*, 2025. **679**: p. 531-543.
20. Wu, Y., et al., *Core-shell manganese cobalt oxide-nickel molybdenum layered double hydroxide composites for supercapacitor electrodes*. *Journal of Energy Storage*, 2025. **131**: p. 117529.
21. Patil, V.V., et al., *Crystallinity transformation engineering of hydrous cobalt nickel phosphate cathodes for hybrid supercapacitor devices: Extrinsic/battery to intercalation type pseudocapacitors*. *Chemical Engineering Journal*, 2024. **485**: p. 150055.
22. Mendhe, A.C., et al., *Hierarchically structured Cu<sub>2</sub>P<sub>2</sub>O<sub>7</sub> nanoflakes as a binder-free electrodes for high-performance supercapacitors*. *Chemical Engineering Journal*, 2024. **496**: p. 153857.
23. Hu, M., et al., *Boosting electrochemical activity via manipulating the d-band center of CoNi<sub>2</sub>Se<sub>4</sub>/MXene heterostructure for supercapacitor application*. *Chemical Engineering Journal*, 2025. **513**: p. 162785.
24. Zhong, H., et al., *Iron phosphide/carbon nanotube composite with high-performance and decoupled areal capacity as negative electrodes for asymmetric supercapacitors*. *Chemical Engineering Journal*, 2025. **509**: p. 161278.
25. Wang, M., et al., *Construction of nanocomposite by anchoring basket-like Polyoxometalate on porous carbon nanofibers for enhance electrochemical energy storage and bifunctional biosensing performance*. *Chemical Engineering Journal*, 2025. **513**: p. 162840.
